# Supplementary material for: The Neurodevelopmental Impact of Neonatal Morphine Administration
Source: MDPI journal article supplement (doi:10.3390/brainsci4020321), 2014-04-25
Supplement: s1 [file s1]

## Supplementary Information

**Table S1.** Several clinical studies have attempted to examine the long-term developmental impact of neonatal morphine therapy.

| Studies of Long Term Clinical Outcomes of Neonatal Morphine Exposure                                                                                                                             | Result                                                                                                                                                                                                                     |
|--------------------------------------------------------------------------------------------------------------------------------------------------------------------------------------------------|----------------------------------------------------------------------------------------------------------------------------------------------------------------------------------------------------------------------------|
| Grunau <i>et al</i> , 2009 [31]—Neonatal pain, parenting stress and interaction, in relation to cognitive and motor development at 8 and 18 months in preterm infants.                           | Increasing amounts of Neonatal Morphine exposure correlated with worse motor outcome at 8 month but effect dissipated at 18 months                                                                                         |
| Ferguson <i>et al</i> , 2012 [45]—A pilot study of preemptive morphine analgesia in preterm neonates: effects on head circumference, social behavior, and response latencies in early childhood. | No significant difference in IQ or Academic Performance. However, parent reported social problems, increased response latencies, lower body weight and smaller head circumference were noted in the morphine treated group |
| De Graaf <i>et al</i> , 2013 [50]—Does neonatal morphine use affect neuropsychological outcomes at 8 to 9 years of age?                                                                          | No evidence of negative impact of morphine infusion on IQ or executive function at 8 to 9 year follow-up. Possible Protective effect of infusion                                                                           |

© 2014 by the authors; licensee MDPI, Basel, Switzerland. This article is an open access article distributed under the terms and conditions of the Creative Commons Attribution license (<http://creativecommons.org/licenses/by/3.0/>).
